# Supplementary material for: Virtual Screening of Soybean Protein Isolate-Binding Phytochemicals and Interaction Characterization
Source: MDPI journal article supplement (doi:10.3390/foods12020272), 2023-01-06
Supplement: s1 [file s1]

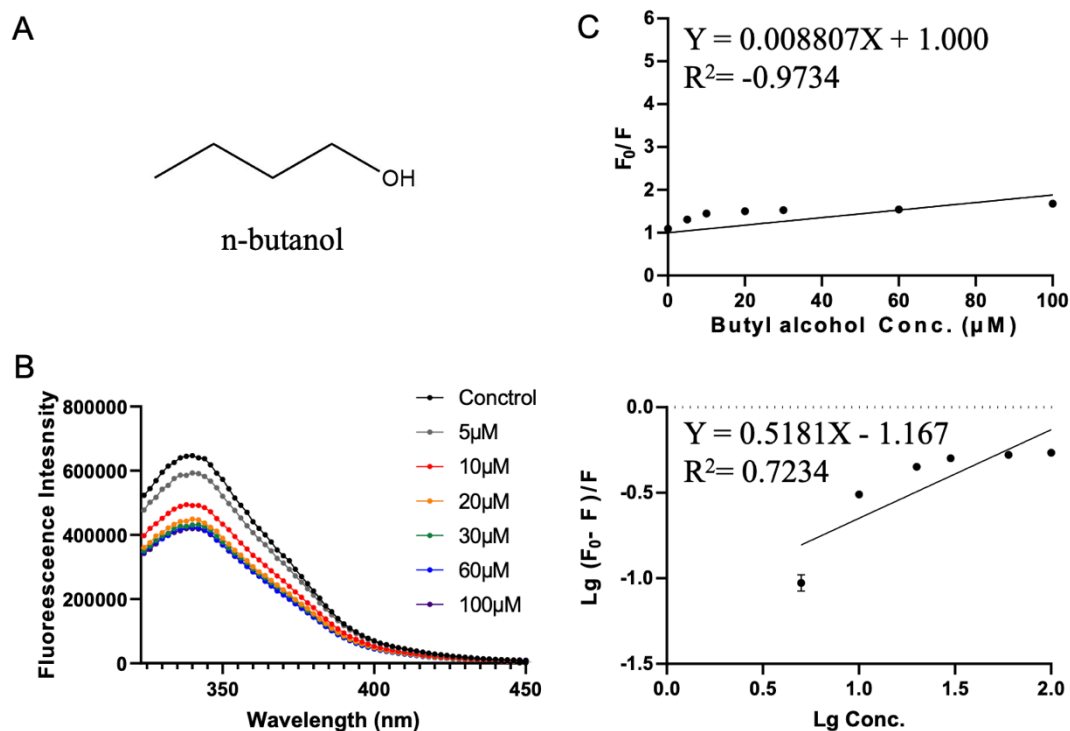

**Figure S1.** Characterization of SPI-n-butanol interaction by fluorescence quenching assay, as a negative control. (A) Molecular chemical structure of n-butanol. (B) The fluorescence emission spectra of SPI titrated with different concentrations of n-butanol. (C) The Stern-Volmer plots for binding parameter calculation. The obtained  $F_0/F$  and  $Lg[(F_0 - F)/F]$  were not fitted well with equation (2) (Figure S1C,  $R^2 = -0.9734$ ) and equation (3) (Figure S1C,  $R^2 = 0.7234$ ) due to the poor concentration dependence.
